# Supplementary material for: Detection of Pathogens and Ticks on Sedentary and Migratory Birds in Two Corsican Wetlands (France, Mediterranean Area)
Source: MDPI journal article supplement (doi:10.3390/microorganisms11040869), 2023-03-28
Supplement: s1 [file s1]

**Supplementary Table S1:** Samples and positive samples collected on birds in two Corsican lagoons. (†Av: Accidental visitor, FB: Formal breeder, IB: introduce breeder, MB: Breeding visitor, OB: Occasional breeder, PM: Passage migrant, RB: Resident breeder, WV: Winter visitor ; ‡Ap: *Anaplasma phagocytophilum*, Ec: *Ehrlichia chaffeensis*, R: *Rickettsia* spp., Rh: *Rickettsia helvetica*, T: *Trypanosoma* spp. and WNV: West Nile virus)

[illegible]

[illegible]

[illegible]

|                           |    |    |                            |                              |          |            |            |                           |          |          |                          |            |          |            |                     |            |                                          |                           |                         |
|---------------------------|----|----|----------------------------|------------------------------|----------|------------|------------|---------------------------|----------|----------|--------------------------|------------|----------|------------|---------------------|------------|------------------------------------------|---------------------------|-------------------------|
| <i>Cisticola juncidis</i> | RB | PM | Gradugin<br>e              | 0                            | -        | -          | -          | -                         | -        | -        | -                        | -          | -        | -          | -                   | -          | -                                        | -                         | -                       |
| <i>Erithacus rubecula</i> | RB | PM | Biguglia,<br>WV            | 68/1 <sup>Ec</sup>           | -        | 1/0        | 1/0        | -                         | -        | -        | -                        | 1/0        | -        | -          | 1/1 <sup>Rh</sup> † | 1/0        | 4/1 <sup>Rh</sup> †                      | 3/1 <sup>Ec</sup> †       | -                       |
| <i>Falco tinnunculus</i>  | RB | PM | Gradugin<br>e              | 1                            | -        | -          | -          | -                         | -        | -        | -                        | -          | -        | -          | -                   | -          | -                                        | -                         | -                       |
| <i>Fringilla coelebs</i>  | RB | PM | Biguglia,<br>WV            | 7                            | -        | -          | -          | -                         | -        | -        | -                        | -          | -        | -          | -                   | -          | -                                        | -                         | -                       |
| <i>Jynx torquilla</i>     | RB | PM | Biguglia                   | 4                            | -        | -          | -          | -                         | -        | -        | -                        | -          | -        | -          | -                   | -          | -                                        | -                         | -                       |
| <i>Otus scops</i>         | RB | PM | Biguglia,<br>Gradugin<br>e | 0                            | -        | -          | -          | -                         | -        | -        | -                        | -          | -        | -          | -                   | -          | -                                        | -                         | -                       |
| <i>Passer italiae</i>     | RB | PM | Gradugin<br>e              | 1                            | -        | -          | -          | -                         | -        | -        | -                        | -          | -        | -          | -                   | -          | -                                        | -                         | -                       |
| <i>Saxicola rubicola</i>  | PM | WV | Gradugin<br>e              | 1                            | -        | -          | -          | -                         | -        | -        | 1/1 <sup>R</sup> †       | -          | -        | -          | -                   | -          | -                                        | -                         | -                       |
| <i>Sylvia atricapilla</i> | RB | PM | Biguglia,<br>WV            | 148                          | -        | -          | -          | -                         | -        | -        | -                        | -          | -        | -          | -                   | -          | 1/1 <sup>Ap</sup> †                      | -                         | -                       |
| <i>Turdus merula</i>      | RB | PM | Biguglia,<br>WV            | 17                           | -        | -          | 1/0        | -                         | -        | -        | -                        | -          | -        | -          | -                   | -          | 2/1 <sup>R</sup> †                       | -                         | -                       |
| <b>Total</b>              |    |    |                            | <b>762/2<sup>WNV</sup> †</b> | <b>-</b> | <b>1/0</b> | <b>2/0</b> | <b>1/1<sup>Rh</sup> †</b> | <b>-</b> | <b>-</b> | <b>2/1<sup>R</sup> †</b> | <b>2/0</b> | <b>-</b> | <b>1/0</b> | <b>1/0</b>          | <b>1/0</b> | <b>11/1<sup>Ap</sup> †,</b>              | <b>4/ 1<sup>Ec</sup>,</b> | <b>37/1<sup>T</sup></b> |
|                           |    |    |                            | <b>, 1<sup>Ec</sup> †</b>    |          |            |            |                           |          |          |                          |            |          |            |                     |            | <b>1<sup>R</sup> †, 1<sup>Rh</sup> †</b> | <b>1<sup>R</sup> †</b>    |                         |
